# Supplementary material
Source: PubMed Central journal article supplement (PMC8683491)
Supplement: 41392_2021_849_MOESM1_ESM.pdf [file 41392_2021_849_MOESM1_ESM.pdf]

## Supplementary Materials for

### SARS-CoV-2-Triggered Mast Cell Rapid Degranulation Induces Alveolar Epithelial Inflammation and Lung Injury

Meng-Li Wu<sup>1</sup>, Feng-Liang Liu<sup>2</sup>, Jing Sun<sup>3</sup>, Xin Li<sup>4</sup>, Xiao-Yan He<sup>2,7</sup>, Hong-Yi Zheng<sup>2</sup>, Yan-Heng Zhou<sup>4</sup>, Qihong Yan<sup>4</sup>, Ling Chen<sup>4</sup>, Guo-Ying Yu<sup>1</sup>, Junbiao Chang<sup>1</sup>, Xia Jin<sup>5</sup>, Jincun Zhao<sup>3</sup>, Xin-Wen Chen<sup>4,7\*</sup>, Yong-Tang Zheng<sup>2,7\*</sup>, Jian-Hua Wang<sup>4,6,\*</sup>

#### \*Correspondence to:

J.-H, Wang, Email: [wang\\_jianhua@gibh.ac.cn](mailto:wang_jianhua@gibh.ac.cn)

Y.-T, Zheng, Email: [zhengyt@mail.kiz.ac.cn](mailto:zhengyt@mail.kiz.ac.cn)

X.-W, Chen, Email: [Chen\\_xinwen@gibh.ac.cn](mailto:Chen_xinwen@gibh.ac.cn)

#### This PDF file includes:

**Figure S1 to S7**

**Table S1**

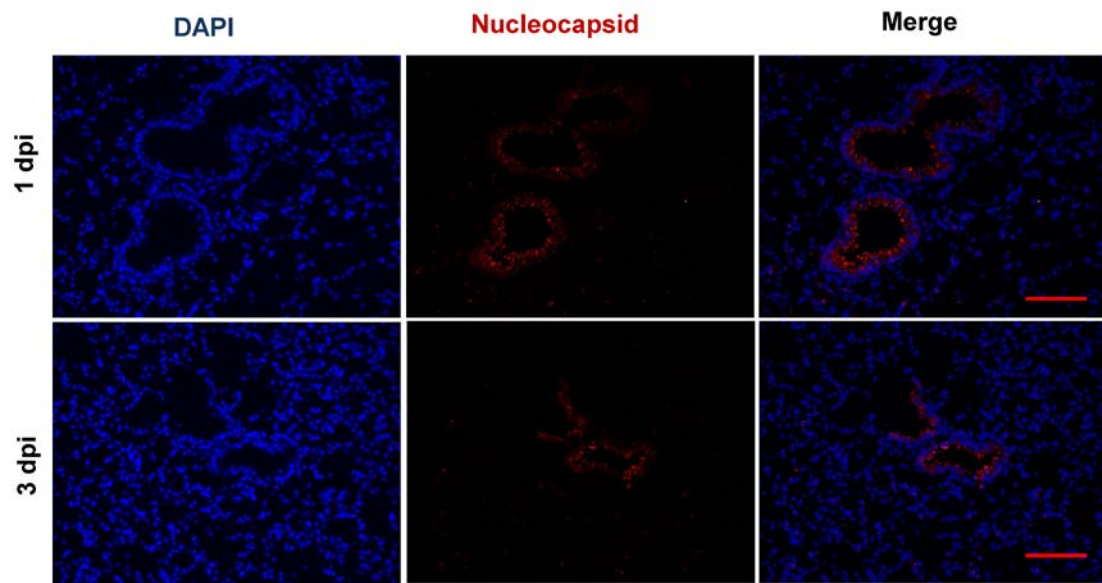

**Figure S1. Virus distribution in SARS-CoV-2-infected humanized mice.** C57BL/6N-Ace2<sup>em2(hACE2-WPRE,pgk-puro)/CCLA</sup> mice were intranasally infected with SARS-CoV-2 (strain 107) at a dose of  $2 \times 10^6$  TCID<sub>50</sub>, and were euthanized at the 1 dpi and 3 dpi. Lung sections were stained with anti-nucleocapsid antibody (red) and DAPI (blue).

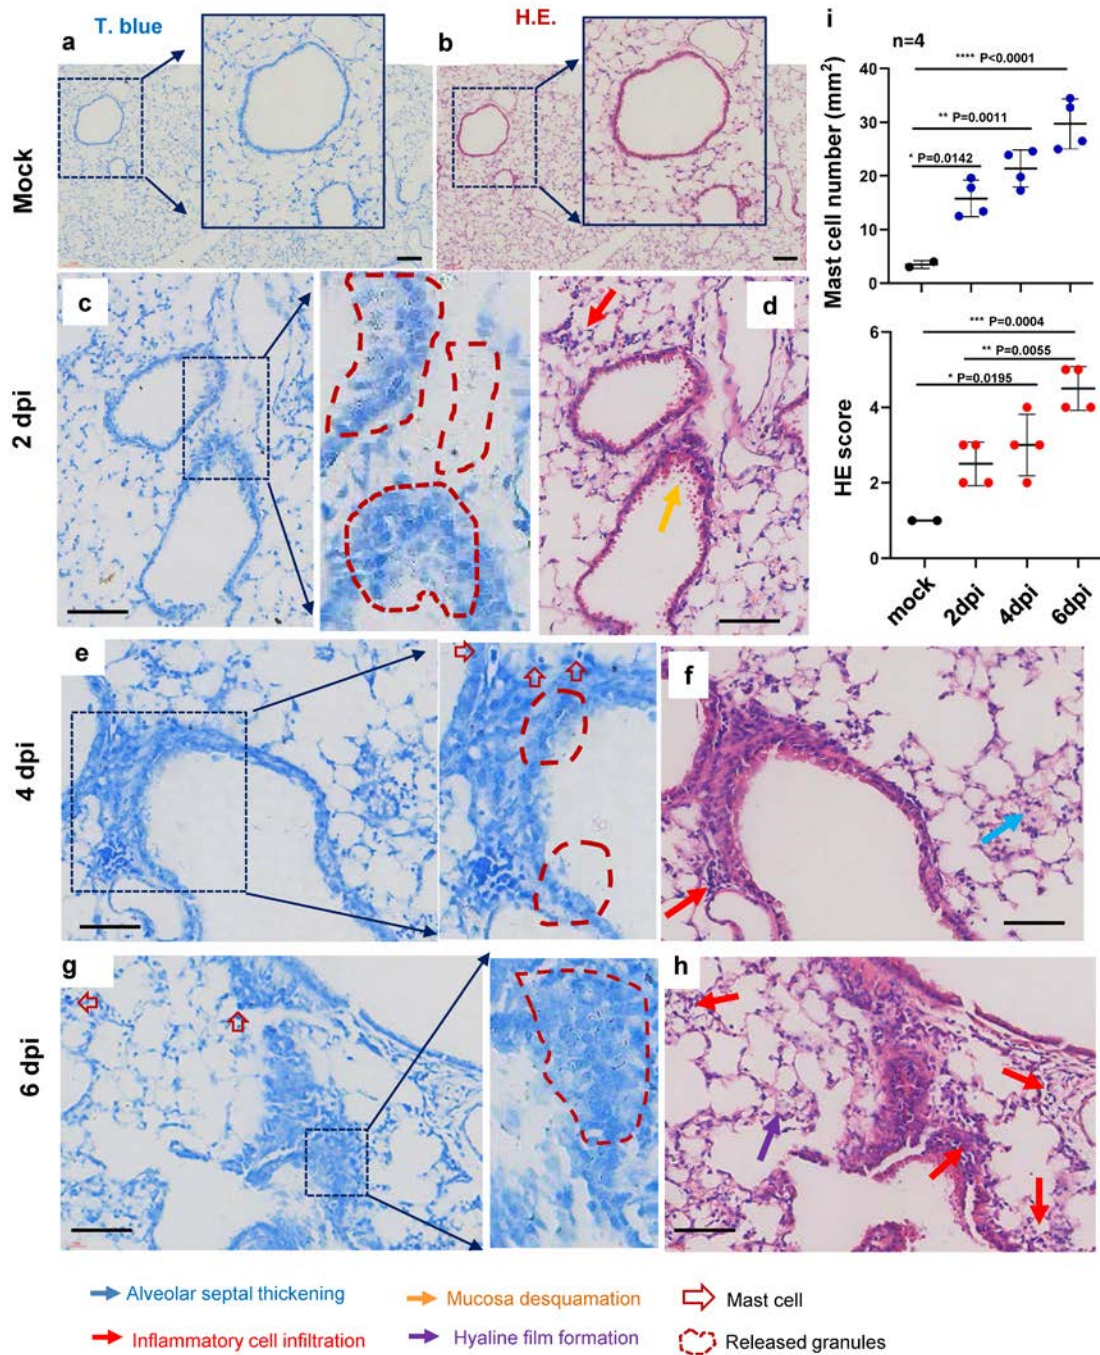

**Figure S2. SARS-CoV-2 induces mast cell degranulation and lung injury in Ad5-hACE2-transduced BALB/c mice.**

Five Mice were transduced with  $2.5 \times 10^8$  FFU of Ad5-hACE2 in 75 mL of DMEM intranasally, 5 days later, mice received  $7 \times 10^4$  TCID<sub>50</sub> of SARS-CoV-2. Two mice were used as the mock-infections. The lungs were collected at 2 dpi, 4 dpi, and 6 dpi. Toluidine blue staining was used to observe MCs and their

degranulation (a, c, e and g), and the lung injury was observed by H.E. staining (b, d, f, h). Scale bar: 100  $\mu$ m. (i)The pathological score was assessed according to the degree of lung tissue lesions and MC count in lung sections was calculated. \* $p < 0.05$ , \*\* $p < 0.01$ , \*\*\* $p < 0.001$ , and \*\*\*\*  $p < 0.0001$  are considered significant differences.

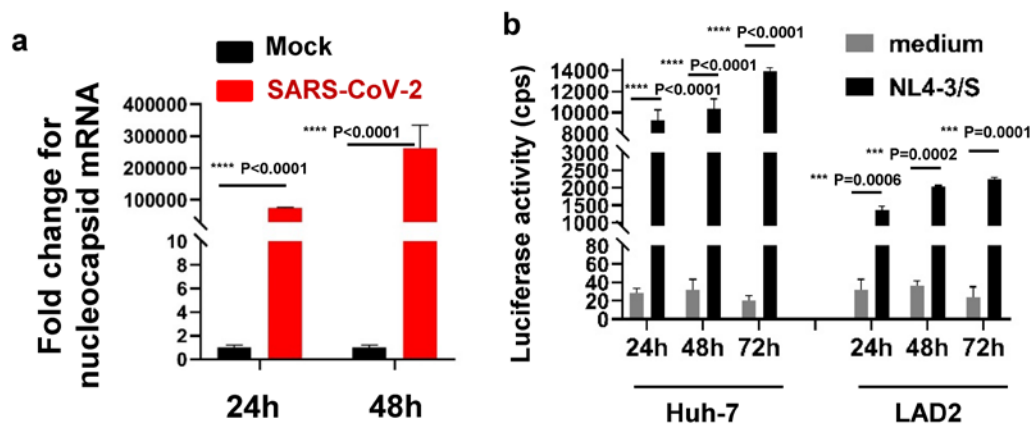

**Figure S3. SARS-CoV-2 infection of LAD2 cells.**

(a) LAD2 cells were infected with SARS-CoV-2 (strain 2019-nCoV WIV04) (M.O.I. =1) for the indicated time, and the cellular levels of nucleocapsid mRNA were quantified with q(RT-)PCR. Data are normalized to  $\beta$ -actin mRNA and expressed as  $-\Delta Ct$  values. (b) LAD2 and Huh-7 cells ( $1 \times 10^5$ ) were infected with SARS-CoV-2 Spike-pseudotyped lentivirus (NL4-4/S) (5 ng p24<sup>gag</sup>) for 72 h, and viral infection was determined by measuring the luciferase activity. One representative data from 3 independent repeats are shown (a, b). Data are presented as mean  $\pm$  SD. \*\*\* $p < 0.001$  and \*\*\*\*  $p < 0.0001$  are considered significant differences.

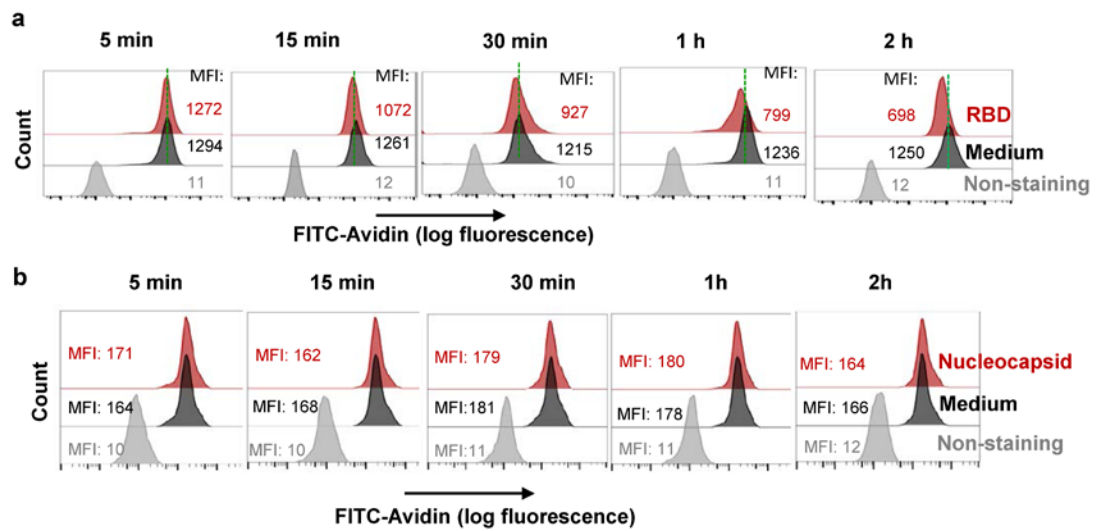

**Figure S4. Assay for LAD2 cell degranulation.**

LAD2 cells were treated with or without Spike-RBD (a) or nucleocapsid protein (b) (5  $\mu\text{g/ml}$  each) of SARS-CoV-2 at 37°C for the indicated time, then cells were permeabilized and immunostained with anti-avidin-FITC at 4°C for 1 h, and analyzed with flow cytometry. One representative result from 7 repeats is shown. MFI: mean fluorescence intensity (a, b).

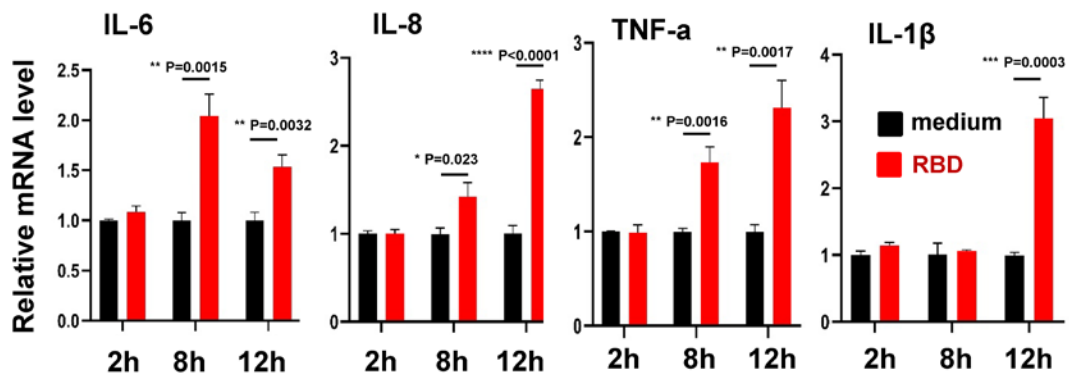

**Figure S5. Cytokine profile in LAD2 cells.**

LAD2 cells were treated with or without Spike-RBD (5 µg/ml) at 37°C for the indicated time, and the mRNA levels of IL-6, IL-8, IL-1β and TNF-α were quantified with q(RT-) PCR, and normalized to *gapdh* mRNA. One representative result from 3 repeats is shown. Data are presented as mean ± SD. \* p<0.05, \*\* p<0.01, \*\*\* p<0.001 and \*\*\*\*p<0.0001 are considered significant differences.

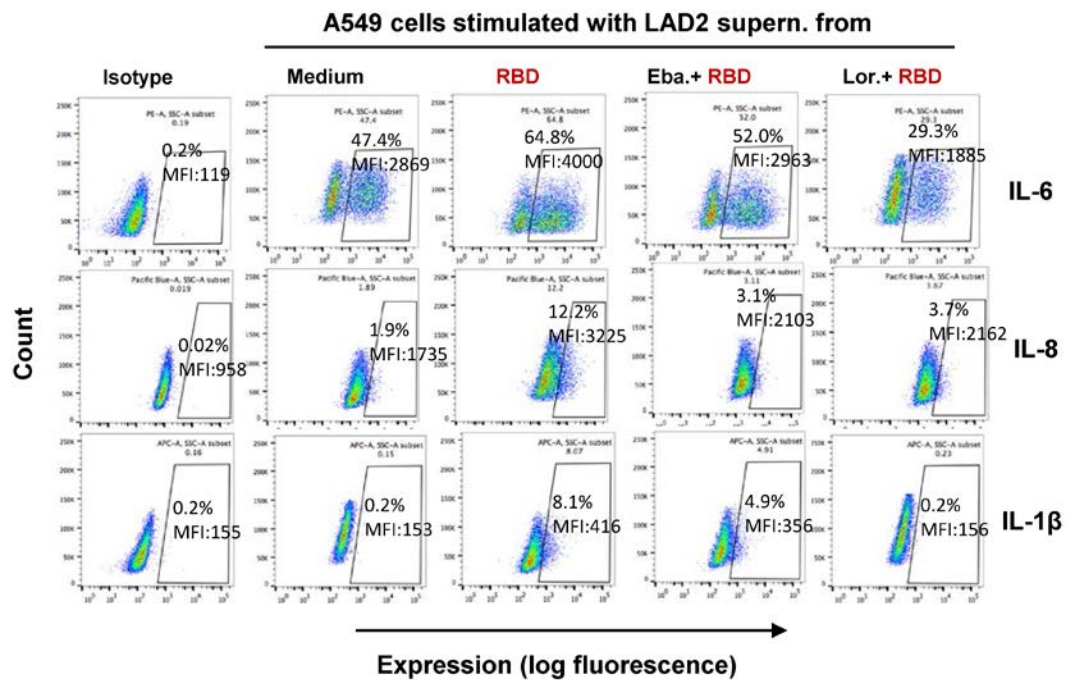

**Figure S6. Cytokine productions in A549 cells.**

LAD2 cells were prior-treated with or without Lor. (5 µg/mL) or Eba. (3 µg/mL) for 20 h, then cells were treated with Spike-RBD (5 µg/ml) for 2 h, and the culture supernatants were harvested to treat A549 cells for additional 24 h, or A549 cells were directly treated with or without Spike-RBD for 24 h. The productions of IL-6, IL-8, and IL-1β were measured with intracellular immunostaining with specific antibodies. One representative result from 3 repeats is shown. MFI: mean fluorescence intensity.



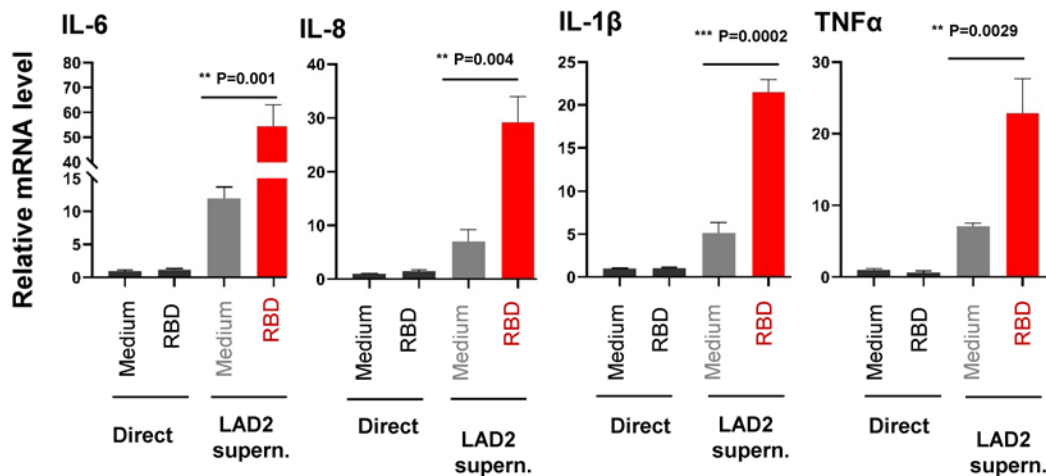

**Figure S7. Cytokine expression in H1299 cells.**

LAD2 cells were treated with Spike-RBD (5  $\mu\text{g}/\text{ml}$ ) for 2 h, and the culture supernatants were harvested to treat H1299 cells for additional 24 h, and the mRNA levels of IL-6, TNF- $\alpha$ , IL-8 and IL-1 $\beta$  were quantified with real time q(RT-) PCR, and normalized to *gapdh* mRNA. One representative result from 3 repeats is shown. Data are presented as mean  $\pm$  SD. \*\*  $p < 0.01$  and \*\*\*  $p < 0.001$  are considered significant differences.

|                                      |              |                                            |
|--------------------------------------|--------------|--------------------------------------------|
| <b>Human IL-6</b>                    | Forward:     | 5'-CAG ACA GCC ACT CAC CTC TTC AG-3'       |
|                                      | Reverse      | 5'-CAG CCA TCT TTG GAA GGT TCA G-3'        |
| <b>Human TNF-<math>\alpha</math></b> | Forward:     | 5'-CCC AGG CAG TCA GAT CAT CTT C-3'        |
|                                      | Reverse      | 5'-GTG AGG AGC ACA TGG GTG GAG-3'          |
| <b>Human IL-1<math>\beta</math></b>  | Forward:     | 5'-CGT CAG TTG TTG TGG CCA TGG A-3'        |
|                                      | Reverse      | 5'- GAG CGT GCA GTT CAG TGA TCG TA-3'      |
| <b>Human IL-8</b>                    | Forward:     | 5'-CTG ATT TCT GCA GCT CTG TGT GA-3'       |
|                                      | Reverse      | 5'-GGT CCA GAC AGA GCT CTC TTC CA-3        |
| <b>Human CCL20</b>                   | Forward:     | 5'-GCT GCT TTG ATG TCA GTG CT-3'           |
|                                      | Reverse      | 5'-TGT CAC AGC CTT CAT TGG C-3'            |
| <b>Human CCL5</b>                    | Forward:     | 5'-ACC ACA CCC TGC TGC TTT G-3'            |
|                                      | Reverse      | 5'-GCG GTT CTT TCG GGT GAC A-3'            |
| <b>Human MMP9</b>                    | Forward:     | 5'-CCT TCT ACG GCC ACT ACT GTG C-3'        |
|                                      | Reverse      | 5'-GCC AGT ACT TCC CAT CCT TGA AC-3'       |
| <b>Human MMP19</b>                   | Forward:     | 5' -GCA ATG TGGC TCC CTT GAC-3'            |
|                                      | Reverse      | 5' -TCA GTC CAG AAC TCG TCT TCG-3'         |
| <b>Human GAPDH</b>                   | Forward:     | 5'-ATC CCA TCA CCA TCT TCC AGG-3'          |
|                                      | Reverse      | 5'-CCT TCT CCA TGG TGG TGA AGA C-3'        |
| <b>Mouse IL-6</b>                    | Forward:     | 5'-CTT CCA TCC AGT TGC CTT CTT G-3'        |
|                                      | Reverse      | 5'-AAT TAA GCC TCC GAC TTG TGA AG-3'       |
| <b>Mouse TNF-<math>\alpha</math></b> | Forward:     | 5'-CAG ACC CTC ACA CTC AGA TCA TCT-3'      |
|                                      | Reverse      | 5'- CCT CCA CTT GGT GGT TTG CTA-3'         |
| <b>Mouse IL-1<math>\beta</math></b>  | Forward:     | 5'- CTT TCA GAG GCC AGA GAG TCC-3'         |
|                                      | Reverse      | 5'- TCC CTG TAG TGA CAG CAC CT3'           |
| <b>Mouse IL-8</b>                    | Forward:     | 5'-CGG CAA TGA AGC TTC TGT AT-3'           |
|                                      | Reverse      | 5'-CCT TGA AAC TCT TTG CCT CA-3'           |
| <b>Mouse INF<math>\gamma</math></b>  | Forward:     | 5'- ATG AAC GCT ACA CAC TGC ATC-3'         |
|                                      | Reverse      | 5'- CCA TCC TTT TGC CAG TTC CTC-3'         |
| <b>Mouse CRF</b>                     | Forward:     | 5'- CAG AGA TTC CTG AGG CTC CAA CA-3'      |
|                                      | Reverse      | 5'- AGT CAC CGC CAT ACG AGT CCT G-3'       |
| <b>Mouse CCL20</b>                   | Forward:     | 5'-AAG ACA GAT GGC CGA TGA AG-3'           |
|                                      | Reverse      | 5'-AGG TTC ACA GCC CTT TTC AC-3'           |
| <b>Mouse CCL5</b>                    | Forward:     | 5'-GTG CCC ACG TCA AGG AGT AT-3'           |
|                                      | Reverse      | 5'-GGG AAG CTA TAC AGG GTC A-3'            |
| <b>Mouse GAPDH</b>                   | Forward:     | 5'- TGC ACC ACC AAC TGC TTA G-3'           |
|                                      | Reverse      | 5'- GAT GCA GGG ATG ATG TTC-3'             |
| <b>SARS-CoV-2 nucleocapsid</b>       | Forward:     | 5'-GGG GAA CTT CTC CTG CTA GAA T-3'        |
|                                      | Reverse      | 5'-CAG ACA TTT TGC TCT CAA GCT G-3'        |
|                                      | TaqMan probe | 5'-FAM-TTG CTG CTG CTT GAC AGA TT-TAMRA-3' |

**Table S1.** The primers and probes for (RT-) PCR
